# Supplementary material for: Impact of the Oral Adsorbent AST-120 on Organ-Specific Accumulation of Uremic Toxins: LC-MS/MS and MS Imaging Techniques
Source: Toxins (Basel). 2017 Dec 28;10(1):19. doi: 10.3390/toxins10010019 (PMC5793106; doi:10.3390/toxins10010019)
Supplement: Supplementary file 1 [file toxins-10-00019-s001.pdf]

# Supplementary Materials: Impact of the Oral Adsorbent AST-120 on Organ-Specific Accumulation of Uremic Toxins: LC-MS/MS and MS Imaging Techniques

Emiko Sato, Daisuke Saigusa, Eikan Mishima, Taeko Uchida, Daisuke Miura, Tomomi Morikawa-Ichinose, Kiyomi Kisu, Akiyo Sekimoto, Ritsumi Saito, Yuji Oe, Yotaro Matsumoto, Yoshihisa Tomioka, Takefumi Mori, Nobuyuki Takahashi, Hiroshi Sato, Takaaki Abe, Toshimitsu Niwa and Sadayoshi Ito

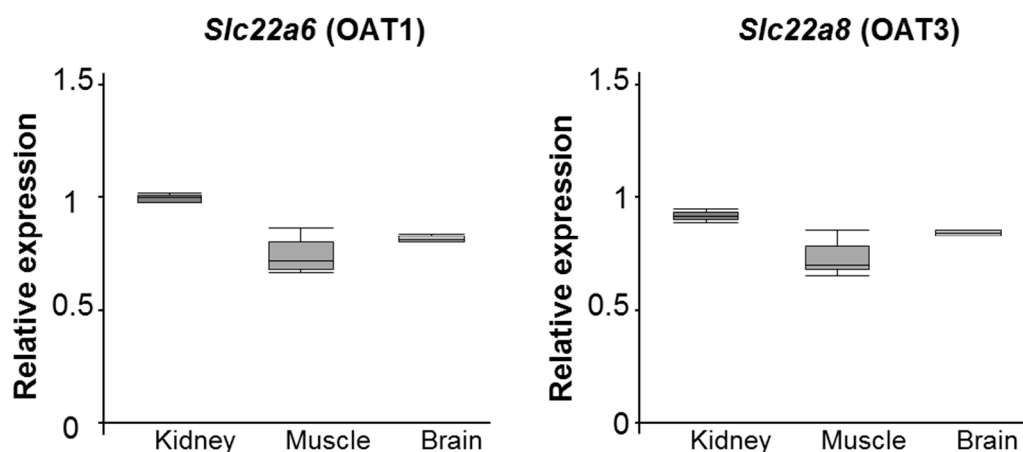

**Figure S1.** Relative mRNA expression levels of *Slc22a6* (organic anion transporter 1; OAT1) and *Slc22a8* (organic anion transporter3; OAT3) in kidney, muscle, and brain of control mice ( $n = 6$ ). Data are shown as box plots. The data are normalized to *Gapdh* expression levels.

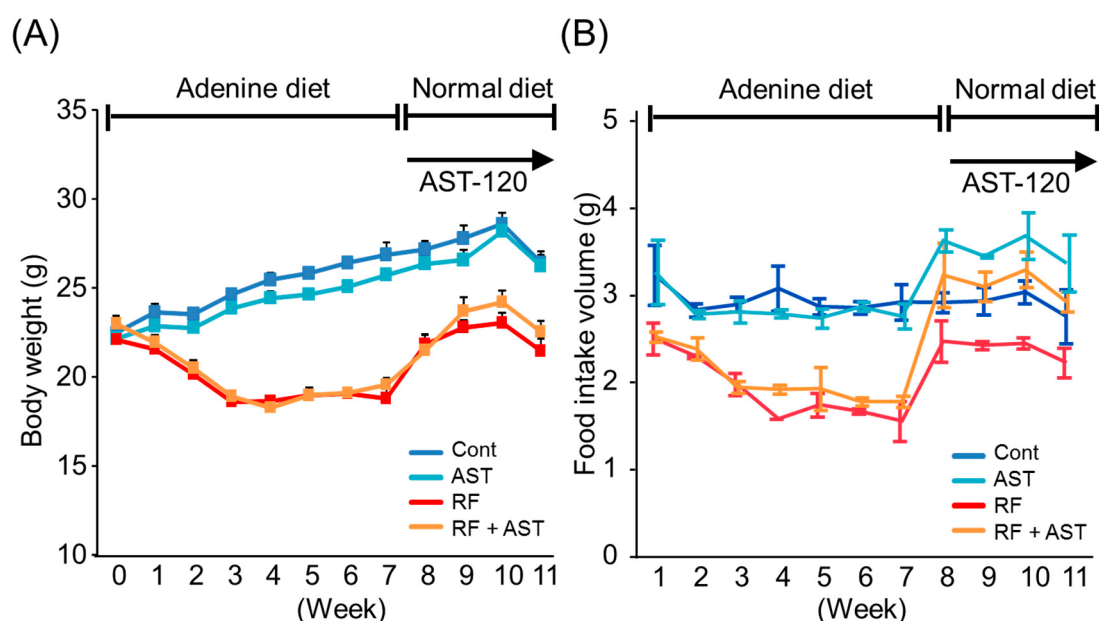

**Figure S2.** Changes in body weight and food intake. (A) Body weight changes, and (B) food intake volume changes among 11 weeks. Control group mice were fed a normal diet for 7 weeks. Renal-failure mice were fed a diet containing 0.2% wt/wt adenine for 7 weeks to induce tubular injury. After 7 weeks, each group was further divided into two groups, one of which received 8% (wt/wt) AST-120. After 4 weeks, all mice were euthanized. Cont, control ( $n = 6$ ); AST, AST-120 ( $n = 6$ ); RF, renal failure ( $n = 7$ ); RF + AST, RF mice treated with AST-120 ( $n = 6$ ).

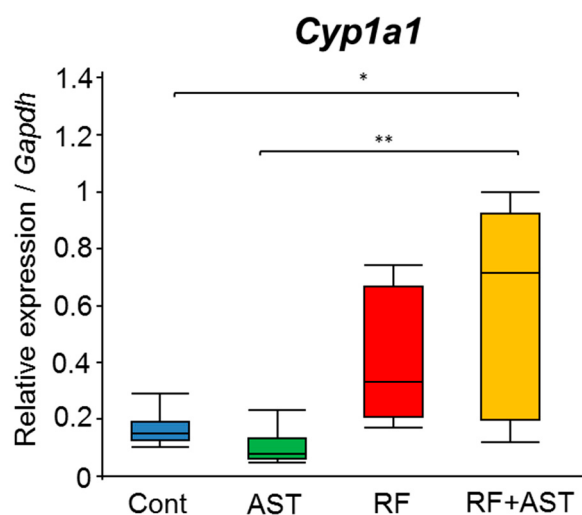

**Figure S3.** Relative mRNA expression levels of *Cyp1a1* in kidney. Data are shown as box plots. Tukey-Kramer test: \*  $p < 0.05$ , \*\*  $p < 0.01$ . Cont, control ( $n = 6$ ); AST, AST-120 ( $n = 6$ ); RF, renal failure ( $n = 7$ ); RF + AST, RF mice treated with AST-120 ( $n = 5$ ).

**Table S1.** Primers used in PCR analysis.

| Gene           |    | Sequence (5' → 3')        |
|----------------|----|---------------------------|
| <i>Pai-1</i>   | Fw | TTCAGTGGCCAATGGAAGACTCCT  |
|                | Rv | AGGGCAGTTCCACAACGTCATACT  |
| <i>Cyp1a1</i>  | Fw | GGCCACTTTGACCCTTACAA      |
|                | Rv | CAGGTAACGGAGGACAGGAA      |
| <i>Slc22a6</i> | Fw | CAGTCAGTGTGTCAGGGACCTTGTA |
|                | Rv | TGTGTGGAACCTGGAATGATGAG   |
| <i>Slc22a8</i> | Fw | GCCAGGACACTCAGCTTGGA      |
|                | Rv | GCAGTCATTAGCTCTGTGGTTGATA |
